# Psychiatric Services

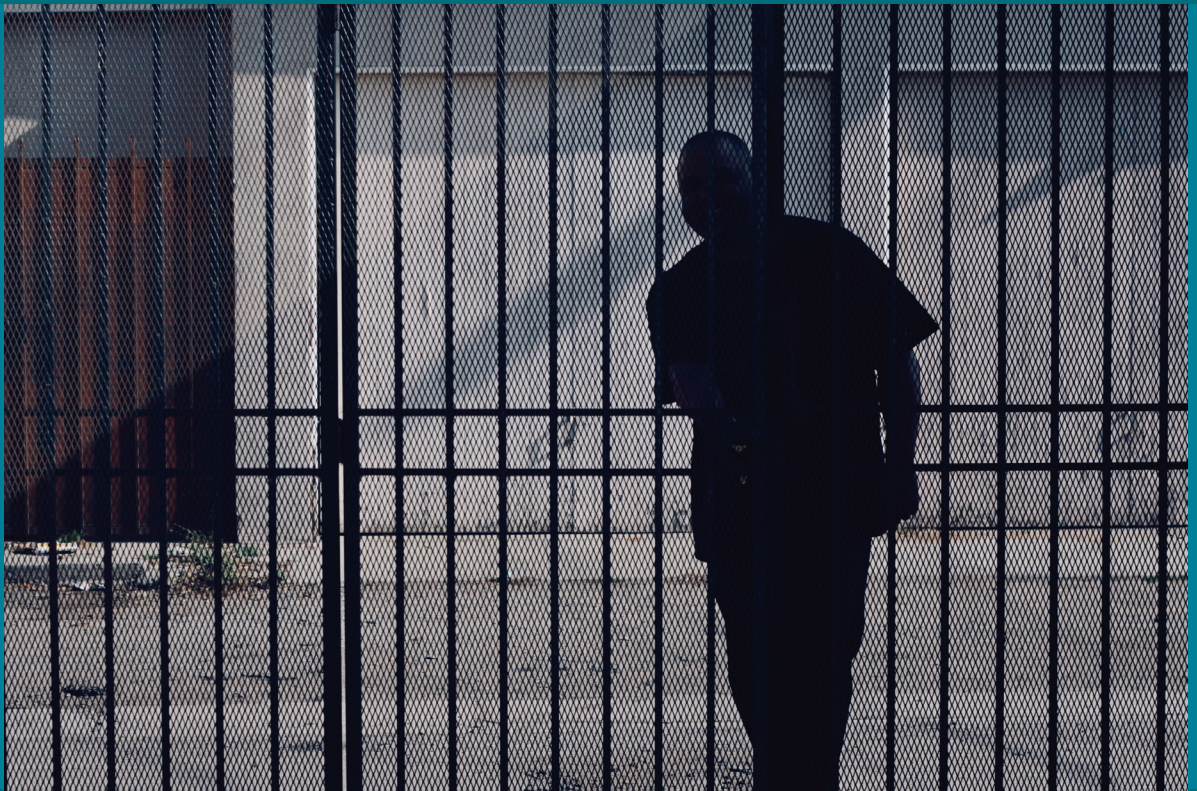

Major mental illness as a risk factor for incarceration

Viewpoint: Developing guidelines for recovery-focused digital mental health care

Cost-effectiveness of universal suicide prevention screening in EDs

Community emergency response: lessons learned from recent hurricanes
