**The Newest Addition to APA Publishing's Portfolio of Journals**

# The American Journal of Psychotherapy

[psychotherapy.psychiatryonline.org](http://psychotherapy.psychiatryonline.org)

**Holly A. Swartz, M.D., Editor-in-Chief**

*The American Journal of Psychotherapy* is a peer-reviewed, interdisciplinary journal published quarterly by the American Psychiatric Association. Begun in 1947 by the Association for the Advancement of Psychotherapy, *The American Journal of Psychotherapy* provides a forum for advancing the theory, science, and clinical practice of psychotherapy, publishing articles that expand the understanding of psychotherapies, especially in the domains of efficacy, process, education, and practice.

The journal publishes empirical papers on psychotherapy outcomes, process, measurement, and education. Maintaining a strong clinical focus, it welcomes case reports, review articles, and training tools that will guide and shape clinical practice.

*The American Journal of Psychotherapy* invites a broad range of perspectives from all psychotherapy disciplines, including but not limited to psychodynamic, interpersonal, cognitive- or dialectical-behavioral, existential, emotion-focused, problem-solving, mentalizing, mindfulness-based, and client-centered approaches.

*The American Journal of Psychotherapy* inclusively addresses topics across treatment modalities, age groups, genders, races and ethnicities, and diagnoses. The journal serves the international community by curating a vibrant, pluralistic, dialogue about psychotherapy that ultimately will inform clinical care.

**Subscribe Now!** .....

➤ **Visit [appi.org](http://appi.org) for pricing and more information!**

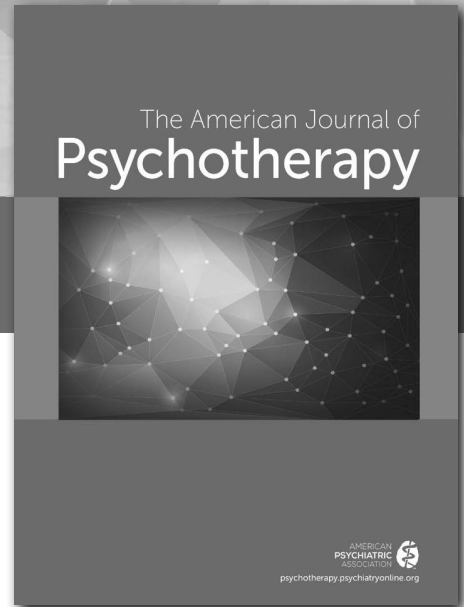

2018 • Vol. 71  
Frequency: Quarterly  
Online ISSN: 2575-6559  
[psychotherapy.psychiatryonline.org](http://psychotherapy.psychiatryonline.org)

AMERICAN  
PSYCHIATRIC  
ASSOCIATION  
PUBLISHING

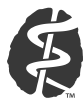

[appi.org](http://appi.org)  
1-800-368-5777  
[appi@psych.org](mailto:appi@psych.org)

[psychotherapy.psychiatryonline.org](http://psychotherapy.psychiatryonline.org)

AH1828

# The DSM-5 Collection

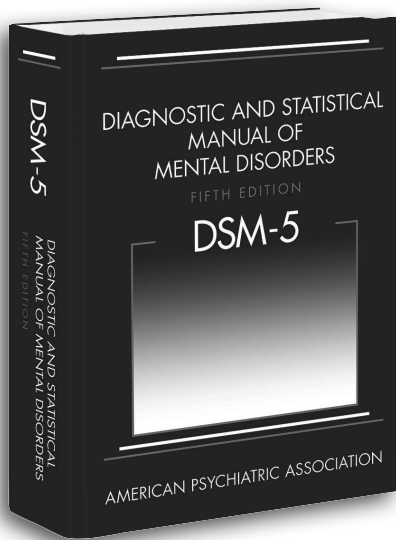

## Diagnostic and Statistical Manual of Mental Disorders, Fifth Edition (DSM-5®)

American Psychiatric Association

This new edition of *Diagnostic and Statistical Manual of Mental Disorders (DSM-5®)*, used by clinicians and researchers to diagnose and classify mental disorders, is the product of more than 10 years of effort by hundreds of international experts in all aspects of mental health. Their dedication and hard work have yielded an authoritative volume that defines and classifies mental disorders in order to improve diagnosis, treatment, and research.

The criteria are concise and explicit, intended to facilitate an objective assessment of symptom presentations in a variety of clinical settings—inpatient, outpatient, partial hospital, consultation-liaison, clinical, private practice, and primary care.

- The latest findings in neuroimaging and genetics have been integrated into each disorder along with gender and cultural considerations.
- The revised organizational structure recognizes symptoms that span multiple diagnostic categories, providing new clinical insights in diagnosis.

- Both ICD-9-CM and ICD-10-CM codes are included for each disorder.

The *Diagnostic and Statistical Manual of Mental Disorders, Fifth Edition*, is the most comprehensive, current, and critical resource for clinical practice available to today's mental health professionals.

2013 • 991 pages • ISBN 978-0-89042-554-1 • Hardcover • \$210.00 • Item #2554  
2013 • 991 pages • ISBN 978-0-89042-555-8 • Paperback • \$160.00 • Item #2555  
2013 • 991 pages • ISBN 978-0-89042-557-2 • eBook • \$128.00 • Item #2557

**DSM-5**  
COLLECTION

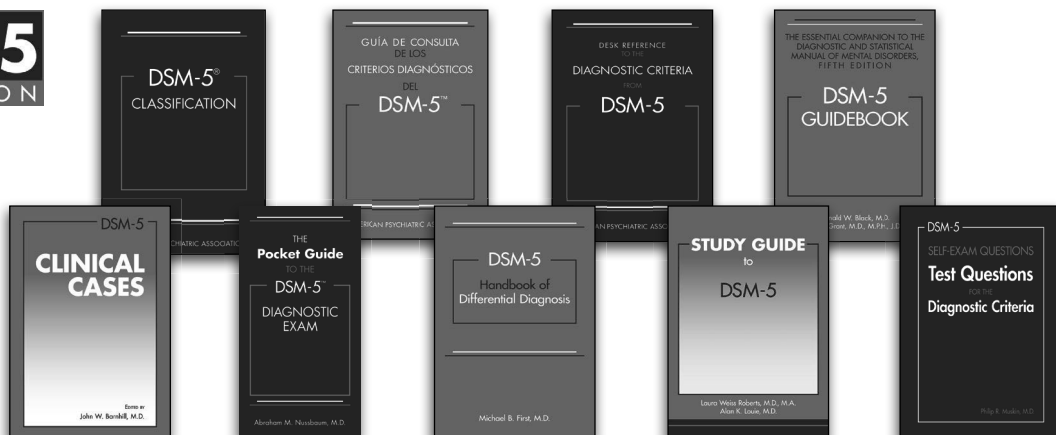

AMERICAN  
PSYCHIATRIC  
ASSOCIATION  
PUBLISHING

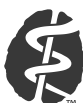

Order Online: [www.appi.org](http://www.appi.org)  
Phone: 703-907-7322  
Toll Free: 1-800-368-5777  
Email: [appi@psych.org](mailto:appi@psych.org)

20% Discount for American Psychiatric  
Association Members

25% Discount for APA Resident-Fellow Members

AH1842A

# EDITOR'S CHOICE

## Psychiatric Services

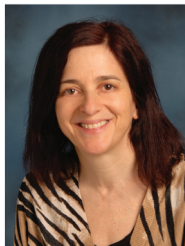

Lisa B. Dixon, M.D., M.P.H.

Collections curated by Lisa B. Dixon, M.D., M.P.H., and the Early-Career Psychiatrist Advisory Committee

Collections Editors: Carrie Cunningham, M.D., M.P.H., and Matthew L. Goldman, M.D., M.S.

Each collection focuses on one topic—summarizing for the researcher, clinician, and policy analyst the latest information and seminal research available from *Psychiatric Services*.

- Family members and caregivers
- Community-based mental health crisis services
- Early psychosis intervention
- Substance use disorders
- Mental health disparities, by race-ethnicity

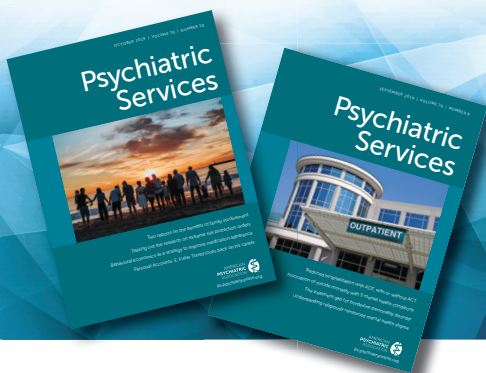

Sign up for Editor's Choice alert at <http://appi.org/etocs>.

Visit [ps.psychiatryonline.org/editorschoice](http://ps.psychiatryonline.org/editorschoice)

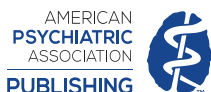

Follow @APAPubPsychSvcs

appi.org • Email: [appi@psych.org](mailto:appi@psych.org) • Toll-Free: 1-800-368-5777

AH1912A

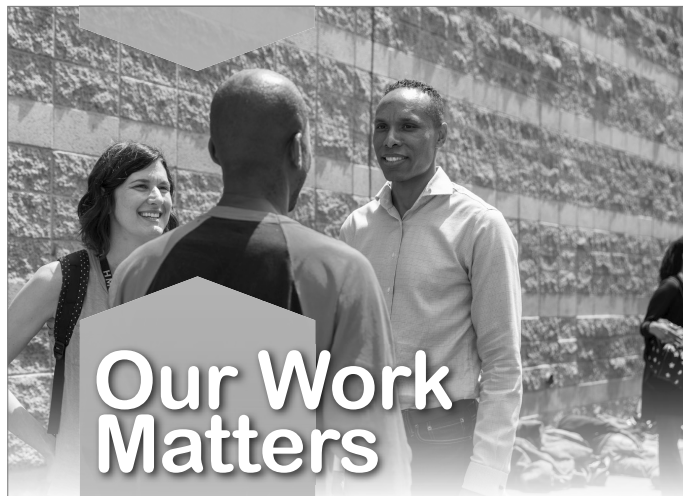

## Our Work Matters

Make a **DIFFERENCE** for those who need it **THE MOST.**

VISIT:  
**Psychiatristjobs.la**

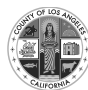

LOS ANGELES COUNTY  
**DEPARTMENT OF MENTAL HEALTH**  
hope. recovery. wellbeing.

- Join the largest and most dynamic mental health department in the country
- Multiple avenues for advancement and professional development
- Flexible work schedules
- Unparalleled work-life balance
- Highly competitive benefits
- Competitive salary with potential bonuses of up to **\$32,000 annually**
- Student loan repayment incentive of up to **\$250,000**
- Reimbursement of eligible relocation costs of up to **\$15,000**

PSYCHIATRIC NEWS

BRIEF

## Enable Psychiatric News Brief

With the American Psychiatric Association's new flash briefing, *Psychiatric News Brief*, you can now listen to synopses of curated articles from *Psychiatric News*. Simply enable this skill and you can listen anytime you choose throughout your day by just saying "Alexa, what's my flash briefing" or "Alexa, tell me what's new".

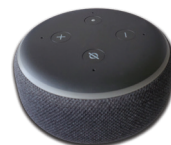

Flash briefing is a customizable Amazon skill that includes updates from your favorite content services. When you say, "Alexa, what's my flash briefing?" or "Alexa, what's the news," you'll hear updates from any organization that you have enabled.

Go to [psychnews.psychiatryonline.org/alexa](http://psychnews.psychiatryonline.org/alexa) to sign up now!

AMERICAN PSYCHIATRIC ASSOCIATION PUBLISHING

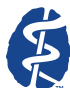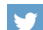

Follow @APAPubPsychSvcs

AMERICAN PSYCHIATRIC ASSOCIATION PUBLISHING

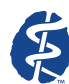

[www.appi.org](http://www.appi.org)  
Email: [appi@psych.org](mailto:appi@psych.org)  
Phone: 1-800-368-5777

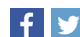



*Ariella, an artist, musician, and real person living with schizophrenia*

SCHIZOPHRENIA  
DIAGNOSIS

EXPERIENCED  
SIDE EFFECTS

STARTED  
COLLEGE

STARTED  
MEDICATION

STOPPED  
MEDICATION

G  
R  
A  
D  
U  
A  
T  
I  
O  
N

# Schizophrenia shouldn't derail her life

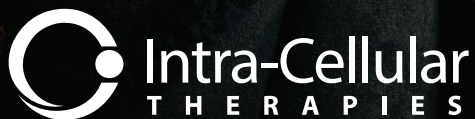

BUILT ON NOBEL PRIZE-WINNING SCIENCE

Visit [SZJourney.com](http://SZJourney.com) to learn more
